# Supplementary material for: Ascorbic acid-modified dual-metal–organic-framework derived C-Fe/Fe3O4 loaded on a N-doped graphene framework for enhanced electrocatalytic oxygen reduction
Source: Royal Society of Chemistry journal article supplement (doi:10.1039/d2nj02711a), 2022-01-01
Supplement: d2nj02711a1.pdf [file d2nj02711a1.pdf]

## Supporting Information

**Ascorbic acid modified dual-metal-organic-framework derived**

**C-Fe/Fe<sub>3</sub>O<sub>4</sub> loaded on N-doped graphene framework**

**for enhanced electrocatalytic oxygen reduction**

Yating Zhang<sup>\*a,b</sup>, Nana Zhang<sup>a</sup>, Lei Shen<sup>a</sup>, Gang Lin<sup>a</sup>, Pei He<sup>a</sup>, Ke Suo<sup>a</sup>, Ting Zhang<sup>a</sup>, Xiaobo Wang<sup>a</sup>,  
Keke Li<sup>a</sup>

<sup>a</sup>College of Chemistry and Chemical Engineering, Xi'an University of Science and  
Technology, Xi'an 710054, China;

<sup>b</sup>Key Laboratory of Coal Resources Exploration and Comprehensive Utilization, Ministry of  
Land and Resources, Xi'an 710021, China

\* Corresponding author: [zhangyt@xust.edu.cn](mailto:zhangyt@xust.edu.cn) (Y.T. Zhang)

## 1. Characterization of material

The morphologies of the catalysts were tested using a scanning electron microscope (SEM, Sirion 200). The particle size and internal structure of products were researched via transmission electron microscopy (TEM, FEI, Tecnai-F20). X-ray diffraction (XRD) patterns were measured via X-ray diffractometer (Bruker D8 Advance) with Cu-K $\alpha$  radiation. Raman spectra were implemented on an inVia Reflex spectrometer with an excitation wavelength of 532 nm. The surface area of products was computed by the Brunauer-Emmett-Teller (BET) method in the adsorption data. The X-ray photoelectron spectroscopy was implemented by virtue of the ThermoFisher K-Alpha instrument.

## 2. Electrochemical performance evaluation

The electrochemical properties of the ORR were performed on the 760D electrochemical workstation. The three electrode system is made up of an Ag/AgCl (reference electrode), a Pt wire (counter electrode), a glass carbon electrode (GCE, working electrode). The preparation process of working electrode is as follows: 5.0 mg catalyst tested was mixed in 1 mL of 5% Nafion (100  $\mu$ L), ethanol (450  $\mu$ L) and water (450  $\mu$ L) followed by ultrasonication for 30 min. Afterward, 10  $\mu$ L of the above ink was dripped into the well-polished glassy carbon electrode using a microliter syringe, and then let it dry naturally. The loading capacity of all catalysts and the benchmark Pt/C catalyst is calculated as follows: The diameter of the glass carbon electrode is 5 mm, and its area is about 0.196 cm<sup>2</sup>. The concentration of catalyst ink is 5 mg/mL. For CVs and LSV test, drop 0.01 mL catalyst ink, and the catalyst load is:  $5 \times 0.01 / 0.196 \approx 0.25$  mg/cm<sup>2</sup>. All electrochemical measurements were performed in O<sub>2</sub>- or N<sub>2</sub>-saturated 0.1 M KOH. Then, cyclic voltammograms (CVs) were measured between -0.8 and 0.2 V to activate the catalysts. The linear sweep voltammograms (LSV) were conducted at different electrode speeds from 400 to 2500 rpm.

The ORR dynamics can be analyzed using the Koutecky-Levich (K-L) equations:

$$\frac{1}{j} = \frac{1}{j_k} + \frac{1}{B\omega^{\frac{1}{2}}} \quad (1)$$

$$B = 0.2nFC_0D_0^{\frac{2}{3}}\nu^{-\frac{1}{6}} \quad (2)$$

In which,  $j_k$  and  $\omega$  are kinetic current density on RDE and the rotating speed of the RDE, respectively.  $F$  is the Faraday constant (96485 C mol<sup>-1</sup>),  $D_0$  is the diffusion coefficient of O<sub>2</sub> in

0.1 M KOH ( $1.9 \times 10^{-5} \text{ cm}^2 \text{ s}^{-1}$ ),  $\nu$  is the kinetic viscosity of the electrolyte ( $1.2 \times 10^{-6} \text{ mol cm}^{-3}$ ), and  $C_0$  is the concentration of  $O_2$ .

The RRDE test was implemented via LSV from 0.2 to -1 V versus Ag/AgCl with a scanning speed of  $10 \text{ mV s}^{-1}$  at 1600 rpm. Meanwhile the ring electrode was maintained at 1.3 V versus RHE. The number of transferred electrons ( $n$ ) and the percentage of hydrogen peroxide ( $H_2O_2$ ) were counted by using the following formula:

$$H_2O_2\% = 200 \frac{I_r/N}{I_d + I_r/N} \quad (3)$$

$$n = 4 \frac{I_d}{I_d + I_r/N} \quad (4)$$

Here,  $I_d$  refers to the disk current,  $I_r$  refers to the ring current, and  $N$  symbolizes the collection coefficient of the platinum wire ( $N = 0.37$ ).

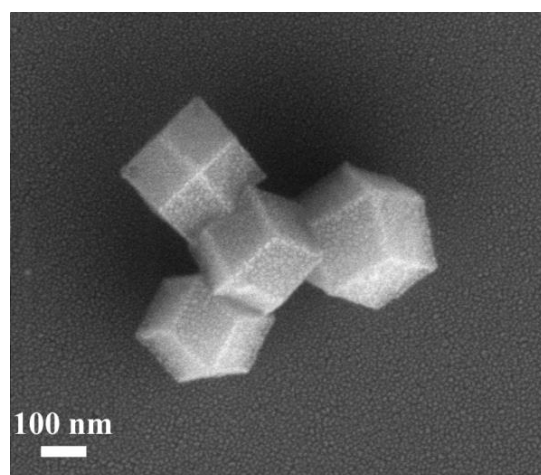

Fig. S1. The SEM images of Fe/Zn-MOFs.

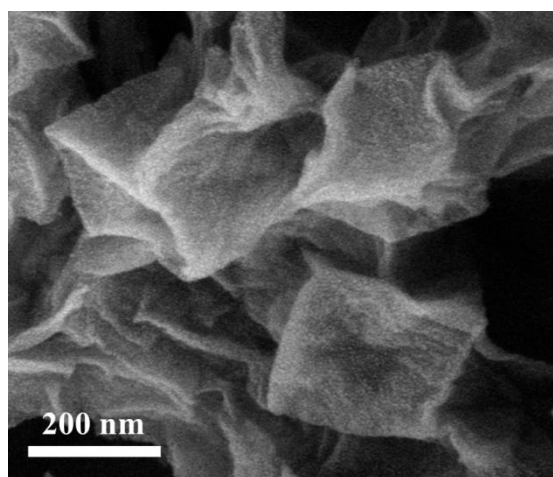

Fig. S2. The SEM images of C-Fe/Zn-MOFs@GO.

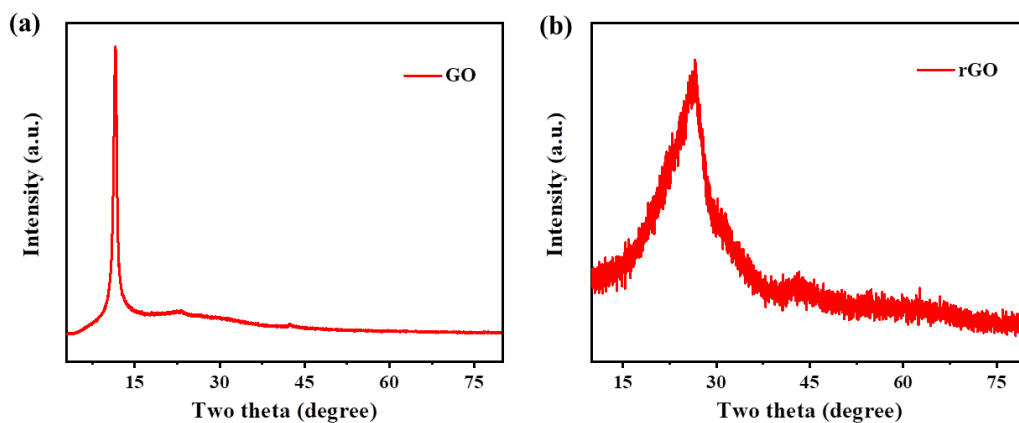

Fig. S3. XRD patterns of (a) GO and (b) rGO.

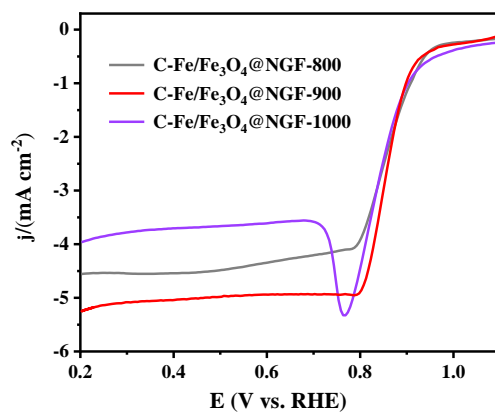

Fig. S4. LSV curves of C-Fe/Fe<sub>3</sub>O<sub>4</sub>@NGF at different temperatures.

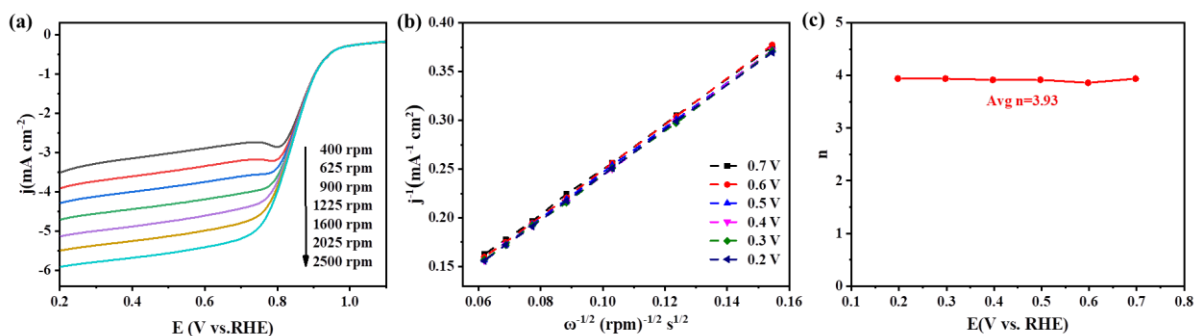

Fig. S5. (a) LSV curves of C-Fe/Fe<sub>3</sub>O<sub>4</sub> catalyst recorded at different rotation rates. (b) Corresponding Kouteck-Levich plots derived from the RDE data. (c) The calculated electron transfer number derived from Kouteck-Levich plots.

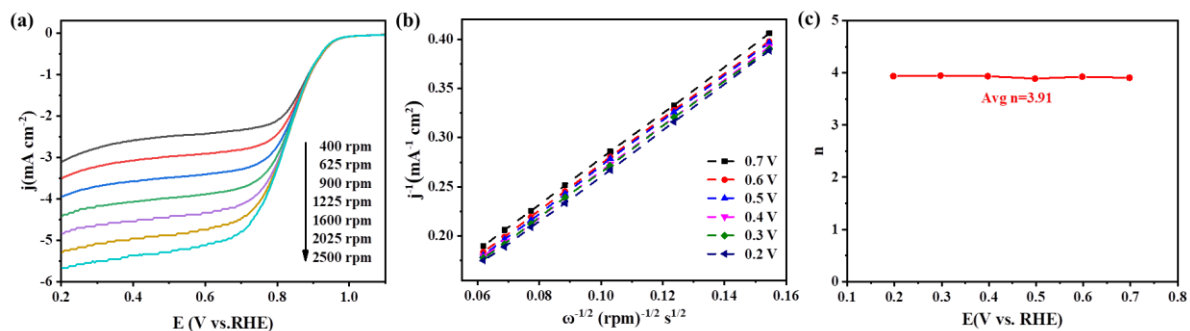

Fig. S6. (a) LSV curves of Fe/Fe<sub>3</sub>O<sub>4</sub>@NGF catalyst recorded at different rotation rates. (b) Corresponding Kouteck-Levich plots derived from the RDE data. (c) The calculated electron transfer number derived from Kouteck-Levich plots.

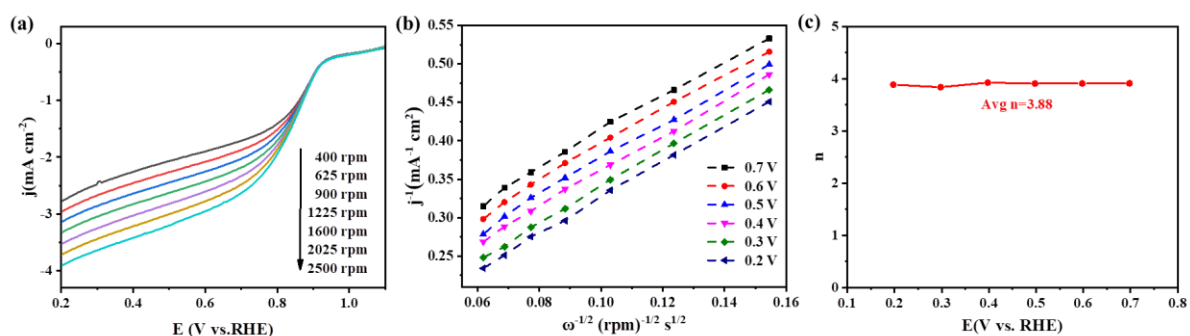

Fig. S7. (a) LSV curves of Fe/Fe<sub>3</sub>O<sub>4</sub> catalyst recorded at different rotation rates. (b) Corresponding Kouteck-Levich plots derived from the RDE data. (c) The calculated electron transfer number derived from Kouteck-Levich plots.

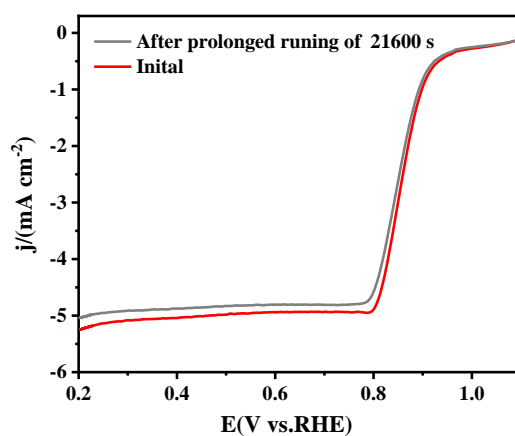

Fig. S8. LSV curves of C-Fe/Fe<sub>3</sub>O<sub>4</sub>@NGF before and after stability tests.

Table. S1 Comparison of ORR performance under alkaline conditions for our synthesized sample with other reported benchmark catalysts.

| catalyst                                                               | ORR activity (0.1 M KOH solution) |                                          |                                 | Ref              |
|------------------------------------------------------------------------|-----------------------------------|------------------------------------------|---------------------------------|------------------|
|                                                                        | CV <i>vs.</i><br>RHE / V          | $E_{\text{onset}}$ <i>vs.</i><br>RHE / V | $E_{1/2}$ <i>vs.</i><br>RHE / V |                  |
| <b>Co<sub>3</sub>Fe<sub>7</sub>-PCNF-850</b>                           | 0.83 V                            |                                          | 0.85 V                          | [1]              |
| <b>H-Fe-N<sub>x</sub>-C</b>                                            |                                   | 1.05 V                                   | 0.92 V                          | [2]              |
| <b>Co/N CCPC-3</b>                                                     | 0.752 V                           | 0.921 V                                  | 0.827 V                         | [3]              |
| <b>Fe@N-CNTs@rGO</b>                                                   | 0.769 V                           |                                          | 0.83 V                          | [4]              |
| <b>a-Fe<sub>2</sub>O<sub>3</sub>/Fe<sub>3</sub>O<sub>4</sub>/hNCNC</b> | 0.82 V                            | 1.030 V                                  | 0.838 V                         | [5]              |
| <b>N-Co<sub>3</sub>O<sub>4</sub>@NC-2</b>                              |                                   | 0.89 V                                   | 0.77 V                          | [6]              |
| <b>Co-N/CNFs</b>                                                       |                                   | 0.92 V                                   | 0.82 V                          | [7]              |
| <b>Ni-NC700</b>                                                        | 0.73 V                            | 0.86 V                                   | 0.75 V                          | [8]              |
| <b>Fe<sub>20</sub>@N/HCSs</b>                                          |                                   | -                                        | 0.86 V                          | [9]              |
| <b>Co,N-C900</b>                                                       | 0.88 V                            | 0.97 V                                   | 0.85 V                          | [10]             |
| <b>Fe<sub>3</sub>O<sub>4</sub>@NHCSs</b>                               |                                   | 0.952 V                                  | 0.822 V                         | [11]             |
| <b>L-CCNTs-Co-800</b>                                                  | 0.79 V                            | 0.90 V                                   | 0.84 V                          | [12]             |
| <b>Co@BNCNTs-900</b>                                                   | 0.83 V                            | 0.93 V                                   | 0.82 V                          | [13]             |
| <b>Fe<sub>3</sub>C-Co/NC</b>                                           | 0.82 V                            | 0.94 V                                   | 0.885 V                         | [14]             |
| <b>Co/N-CNTs@Ti<sub>3</sub>C<sub>2</sub>T<sub>x</sub></b>              | 0.80 V                            | 0.936 V                                  | 0.815 V                         | [15]             |
| <b>NG800</b>                                                           |                                   | 0.88 V                                   | 0.76 V                          | [16]             |
| <b>N-hG</b>                                                            | 0.77 V                            | 0.91 V                                   | 0.833 V                         | [17]             |
| <b>COP@K10-Fe-900</b>                                                  | 0.816 V                           | 0.97 V                                   | 0.85 V                          | [18]             |
| <b>N-Co<sub>3</sub>O<sub>4</sub>@NC-2</b>                              |                                   | 0.89 V                                   | 0.77 V                          | [19]             |
| <b>Co@N-CNTF-2</b>                                                     | 0.81 V                            | 0.91 V                                   | 0.81 V                          | [20]             |
| <b>Co/N-BCNTs</b>                                                      | 0.80 V                            |                                          | 0.83 V                          | [21]             |
| <b>CoZn-N-C-6</b>                                                      | 0.80 V                            | 0.971 V                                  | 0.834 V                         | [22]             |
| <b>C-Fe/Fe<sub>3</sub>O<sub>4</sub>@NGF</b>                            | <b>0.84 V</b>                     | <b>0.96 V</b>                            | <b>0.86 V</b>                   | <b>This Work</b> |

## References

- [1] Liu M, He Y, Zhang J.  $\text{Co}_3\text{Fe}_7$  nanoparticles encapsulated in porous nitrogen-doped carbon nanofibers as bifunctional electrocatalysts for rechargeable zinc–air batteries[J]. *Materials Chemistry Frontiers*, 2021, 5(17): 6559-6567.
- [2] Yang H, Liu Y, Liu X, et al. Large-scale synthesis of N-doped carbon capsules supporting atomically dispersed iron for efficient oxygen reduction reaction electrocatalysis[J]. *eScience*, 2022.
- [3] Wang T, He Y, Liu Y, et al. A ZIF-triggered rapid polymerization of dopamine renders Co/N-codoped cage-in-cage porous carbon for highly efficient oxygen reduction and evolution[J]. *Nano Energy*, 2021, 79: 105487.
- [4] Han X, Zheng Z, Chen J, et al. Efficient oxygen reduction on sandwich-like metal@ N–C composites with ultrafine Fe nanoparticles embedded in N-doped carbon nanotubes grafted on graphene sheets[J]. *Nanoscale*, 2019, 11(26): 12610-12618.
- [5] Fan H, Mao K, Liu M, et al. Tailoring the nano heterointerface of hematite/magnetite on hierarchical nitrogen-doped carbon nanocages for superb oxygen reduction[J]. *Journal of Materials Chemistry A*, 2018, 6(43): 21313-21319.
- [6] Wang Z, Xu W, Chen X, et al. Defect-rich nitrogen doped  $\text{Co}_3\text{O}_4/\text{C}$  porous nanocubes enable high-efficiency bifunctional oxygen electrocatalysis[J]. *Advanced Functional Materials*, 2019, 29(33): 1902875.
- [7] Cheng Q, Yang L, Zou L, et al. Single cobalt atom and N codoped carbon nanofibers as highly durable electrocatalyst for oxygen reduction reaction[J]. *Acs Catalysis*, 2017, 7(10): 6864-6871.
- [8] Devi B, Koner R R, Halder A. Ni (II)-dimeric complex-derived nitrogen-doped graphitized carbon-encapsulated nickel nanoparticles: efficient trifunctional electrocatalyst for oxygen reduction reaction, oxygen evolution reaction, and hydrogen evolution reaction[J]. *ACS Sustainable Chemistry & Engineering*, 2018, 7(2): 2187-2199.
- [9] Wang B, Ye Y, Xu L, et al. Space-Confined Yolk-Shell Construction of  $\text{Fe}_3\text{O}_4$  Nanoparticles Inside N-Doped Hollow Mesoporous Carbon Spheres as Bifunctional Electrocatalysts for Long-Term Rechargeable Zinc-Air Batteries[J]. *Advanced Functional Materials*, 2020, 30(51): 2005834.
- [10] Liu X, Li W, Zou S. Cobalt and nitrogen-codoped ordered mesoporous carbon as highly efficient bifunctional catalysts for oxygen reduction and hydrogen evolution reactions[J]. *Journal of Materials*



- Chemistry A, 2018, 6(35): 17067-17074.
- [11] Li Y, Huang H, Chen S, et al. 2D nanoplate assembled nitrogen doped hollow carbon sphere decorated with  $\text{Fe}_3\text{O}_4$  as an efficient electrocatalyst for oxygen reduction reaction and Zn-air batteries[J]. Nano Research, 2019, 12(11): 2774-2780.
- [12] Liang Z, Fan X, Lei H, et al. Cobalt-Nitrogen-Doped Helical Carbonaceous Nanotubes as a Class of Efficient Electrocatalysts for the Oxygen Reduction Reaction[J]. Angewandte Chemie, 2018, 130(40): 13371-13375.
- [13] Ma L, Wang R, Li Y H, et al. Apically Co-nanoparticles-wrapped nitrogen-doped carbon nanotubes from a single-source MOF for efficient oxygen reduction[J]. Journal of Materials Chemistry A, 2018, 6(47): 24071-24077.
- [14] Yang C C, Zai S F, Zhou Y T, et al.  $\text{Fe}_3\text{C}$ -Co nanoparticles encapsulated in a hierarchical structure of N - doped carbon as a multifunctional electrocatalyst for ORR, OER, and HER[J]. Advanced Functional Materials, 2019, 29(27): 1901949.
- [15] Zhang Y, Jiang H, Lin Y, et al. In situ growth of cobalt nanoparticles encapsulated nitrogen - doped carbon nanotubes among  $\text{Ti}_3\text{C}_2\text{T}_x$  (MXene) matrix for oxygen reduction and evolution[J]. Advanced Materials Interfaces, 2018, 5(16): 1800392.
- [16] Lemes G, Sebastián D, Pastor E, et al. N-doped graphene catalysts with high nitrogen concentration for the oxygen reduction reaction[J]. Journal of Power Sources, 2019, 438: 227036.
- [17] Bian Y, Wang H, Hu J, et al. Nitrogen-rich holey graphene for efficient oxygen reduction reaction[J]. Carbon, 2020, 162: 66-73.
- [18] Guo J, Cheng Y, Xiang Z. Confined-space-assisted preparation of  $\text{Fe}_3\text{O}_4$ -nanoparticle-modified Fe-N-C catalysts derived from a covalent organic polymer for oxygen reduction[J]. ACS Sustainable Chemistry & Engineering, 2017, 5(9): 7871-7877.
- [19] Wang Z, Xu W, Chen X, et al. Defect-rich nitrogen doped  $\text{Co}_3\text{O}_4/\text{C}$  porous nanocubes enable high - efficiency bifunctional oxygen electrocatalysis[J]. Advanced Functional Materials, 2019, 29(33): 1902875.
- [20] Guo H, Feng Q, Zhu J, et al. Cobalt nanoparticle-embedded nitrogen-doped carbon/carbon nanotube frameworks derived from a metal-organic framework for tri-functional ORR, OER and HER electrocatalysis[J]. Journal of Materials Chemistry A, 2019, 7(8): 3664-3672.
- [21] Wang R, Yan T, Han L, et al. Tuning the dimensions and structures of nitrogen-doped carbon

nanomaterials derived from sacrificial g-C<sub>3</sub>N<sub>4</sub>/metal-organic frameworks for enhanced electrocatalytic oxygen reduction[J]. *Journal of Materials Chemistry A*, 2018, 6(14): 5752-5761.

- [22] Mi J L, Liang J H, Yang L P, et al. Effect of Zn on size control and oxygen reduction reaction activity of Co nanoparticles supported on N-doped carbon nanotubes[J]. *Chemistry of Materials*, 2019, 31(21): 8864-8874.
